# Supplementary material
Source: publisher site journal article supplement (https://www.dovepress.com/article/474898)
Supplement: Supplementary file 1 [file get_supplementary_file.php]

# LncRNA PTPRG-AS1 promotes breast cancer progression by modulating the miR-4659a-3p/QPCT axis

Mengsi Zhou1, Yanting Li1, Liu Yang2, Shuo Liu2, Lixian Yang3, Bin Xu2, Xiaolong Li4, Quanle Wang4, Haijun Zhao4, Zhenchuan Song2*

**Table S1. Overexpression plasmid sequences for PTPRG-AS1 and QPCT**

| **Name** | **Sequences 5’- 3’** |
| --- | --- |
| PTPRG-AS1 pCDNA3.1 | GACGGATCGGGAGATCTCCCGATCCCCTATGGTGCACTCTCAGTACAATCTGCTCTGATGCCGCATAGTTAAGCCAGTATCTGCTCCCTGCTTGTGTGTTGGAGGTCGCTGAGTAGTGCGCGAGCAAAATTTAAGCTACAACAAGGCAAGGCTTGACCGACAATTGCATGAAGAATCTGCTTAGGGTTAGGCGTTTTGCGCTGCTTCGCGATGTACGGGCCAGATATACGCGTTGACATTGATTATTGACTAGTTATTAATAGTAATCAATTACGGGGTCATTAGTTCATAGCCCATATATGGAGTTCCGCGTTACATAACTTACGGTAAATGGCCCGCCTGGCTGACCGCCCAACGACCCCCGCCCATTGACGTCAATAATGACGTATGTTCCCATAGTAACGCCAATAGGGACTTTCCATTGACGTCAATGGGTGGAGTATTTACGGTAAACTGCCCACTTGGCAGTACATCAAGTGTATCATATGCCAAGTACGCCCCCTATTGACGTCAATGACGGTAAATGGCCCGCCTGGCATTATGCCCAGTACATGACCTTATGGGACTTTCCTACTTGGCAGTACATCTACGTATTAGTCATCGCTATTACCATGGTGATGCGGTTTTGGCAGTACATCAATGGGCGTGGATAGCGGTTTGACTCACGGGGATTTCCAAGTCTCCACCCCATTGACGTCAATGGGAGTTTGTTTTGGCACCAAAATCAACGGGACTTTCCAAAATGTCGTAACAACTCCGCCCCATTGACGCAAATGGGCGGTAGGCGTGTACGGTGGGAGGTCTATATAAGCAGAGCTCTCTGGCTAACTAGAGAACCCACTGCTTACTGGCTTATCGAAATTAATACGACTCACTATAGGGAGACCCAAGCTGGCTAGCGTTTAAACTTAAGCTTGGTACCGAGCTCGGATCCGCGCGGTGACGTCACCGCATCTTTATAAAGGGCCGCCTTGGGGCGCGAAAAGTTCGTGAGGTGTAGTCGCGGCAACCAGGAGGTGCACCCACCACTAGAATTTGAACATCCTAAGAACAGGTATTTTTGTCTCTGCTTTGCTGATGTATCCTCAGCAACCGGAACTGCCTGACATGCCCAGTTCTGGTGATGATTTCACTTTTGACAGAAGCTGTCCCTCAAAAGCAAACATGCAATAGAAGAAACAGATCTCAATGCCATCCATCTGCAGTTGTGACAAGCAAAAAAGTCTCCAGACATGGCCAAATGTCCCCTGGGGGGCAAAATCACCCCCAATTGAGAACTACTGCTCTAAACTATGGAGTCTCACTCTGTCACCCAGGATGGAGTACAGTGGCGTGATCTCGGCTCACTGCAAGCTCCGCCTCCTGGGTTCATGCCATTCTCCTGCCTTAGCCTCCCGAGTAGCTGGGACTACAGGCGCCTGCCACCACGCCCGGCTAATTTTTGTATTTTTAGTAGAGACAGGGTTTCACCGCATTAGCCAGGATGGTCTCGATCTCCTGACCTCGTGATCCGCCCGCCTCAGCCTCCCAAAGTGCTGGGATTACAGGCGTGAGTCACTGTGCCCAGCCAAGTTTAGTATTTTTTGTAGAGACAGAGTTTCACCATGTTGGCCAGGCTGGTCTTGCACTCATGGCCTCAAGTGATCCACCTGCCTCGGCCTCCGAAAGTGCTGGGATTACAGGCGTAAGCCACTGTGCCTGGCCTTAAATGGGTAAATTTCATATGGTATATGAATTATATTTCACTAAAACTTTAAGAAAACATTATACAGTACTGTTCAAATTTTAAGTGGTCCAATTTAAATGCACTATTGTATACAATTCTATGTAATGTCCTTACCATGGTATATGTTAACTATAAATATCTATGCCCCTACCCTTAGTATCAAAGCATATATTATATGCCAGTGAGCCAAGCCCCACATGTCTGTGAAATGTGGTCTTCTAGCCATAGAAGTAGCTTGTGCTCCTAGGGTATTCCTTGAGGCTCTGTATGAAGAATGTCCATTTGTTTGAGTCCCTAACCTACAGAATATTCCTGACCATGGAAATGTGATAGATAGGAGTAAGCACATGGACCAAAAGGCCTGGAGGCTCATCATTTAAGGTACAAGCCAATTATGTAGTCTTTGAAAGAATGCTTTGAAATTCAGCTTGCTTGATTCAATTCCCAATATTTTCATTTGTATTAAAAGATTTGGCCCTTACAGGTTAAAAACAATGTCAGTGTAACCAAGTGACATTCAAATTTTGGCTCCCAACATGTGATATGACATCACTTCATGTGAAAATAGCGAAGCTCCAAACATTTTCTTTCAGTCACCTTATTAAGCTCGCTGAGCCCTGACAGCCTAATGAAAGGCTAAGGGGGAAGAAAATGTCCCAACTTCTACACTGTTGAAGATGGGCTAATGAGAGGTTAGCTTGCAAGAATCATTCTTTCTTGGCATCCTGCTTCTGACTGCTTGGCTTTCAGCTTATACCCAGCATGAAAATTTAATTTCCTCGCAGTTGAAGGTAGTTTAAAGCTTATTACTCACATGCTAAAATGTTGATGTATCTGTTTTTGTGCTTGTTTTCTGGATGATTGGAATGCTCTGCAGTGATGTTCATATCAGCAGTACAGCGCTGGACTTCCTAGTGAAGAAAACAGCAAGATTATAGACACAGTTTAGAAACAAAGGAACACCATATACATTTAAAGGCATAAAGTATTTACTCACTCCCTGGCCACAGCCACCGTTACCTTCTCAATCCCAACTTCGGATATAATTATTGATATATTTATAACGAGTTTATGAAGAATGTGAAAAAGGTATAAAGATTTCATTATTTACTATTTCATCAATCATCTACTTTTTTCTAGTTTTTGACCTAGTCCCTGAGATGTAAAACAATATCTCTTTTTGAATACATCATAGTCTATGGGTGAGAAAAATATTCAAAAAGATAGTCAAACATGATGAATACAAAAGAGGCCTGAGAAAGCTCTGATGGGAGCACAGAACAGAGGAAGGCTTTAGACAGGTGAAAAAATTTACCTAAGTCTTAAAGGAAGAAAGGGAATTTCTAAGAAGTATAATCTCTACCATGATTTGCAATATGCTTACAGGCCTTATAGCCTCATTTTATAATTGTGAGGGTGCATTGACTCTAAAGACTCAGTGCTGAAATAACCCTAATAACAGCCCAACTAATGGTCATATCTCATATATACAGTCTTGACAAATTATTTGTGAACTCTAGTATTTTAAAAGTTATCCTTCTTTGGAAAAATAGCAGTAGCAGAAATAACACTCTTATCCTACCTTGGCCGTGGATTTAAACGTCATCCATTAGCCTAATACAACGTTGCTGAAAAGCCAAATTTTTCTACACTATATGCTTCAAACCCAAGAAAGTACTGGAGCTGACTAATAAGGGAAGTCATTAGCAGTACACAGCTGCTACAAAGAGCCTGAACAAAGTAACACAAAATTATCAGGAGAAATGTTTTACACAGAACAGATGTAGCAGAGTTTAGAAGCATGCAGACTTTTTTTTTCCACAAAGGAGTTGCCTAGTAATTATGCATGTTTTCCATAGTATTTACATTAAACATAATGAAAACAATGAAAAAAAAAAGAATTCTGCAGATATCCAGCACAGTGGCGGCCGCTCGAGTCTAGAGGGCCCGTTTAAACCCGCTGATCAGCCTCGACTGTGCCTTCTAGTTGCCAGCCATCTGTTGTTTGCCCCTCCCCCGTGCCTTCCTTGACCCTGGAAGGTGCCACTCCCACTGTCCTTTCCTAATAAAATGAGGAAATTGCATCGCATTGTCTGAGTAGGTGTCATTCTATTCTGGGGGGTGGGGTGGGGCAGGACAGCAAGGGGGAGGATTGGGAAGACAATAGCAGGCATGCTGGGGATGCGGTGGGCTCTATGGCTTCTGAGGCGGAAAGAACCAGCTGGGGCTCTAGGGGGTATCCCCACGCGCCCTGTAGCGGCGCATTAAGCGCGGCGGGTGTGGTGGTTACGCGCAGCGTGACCGCTACACTTGCCAGCGCCCTAGCGCCCGCTCCTTTCGCTTTCTTCCCTTCCTTTCTCGCCACGTTCGCCGGCTTTCCCCGTCAAGCTCTAAATCGGGGGCTCCCTTTAGGGTTCCGATTTAGTGCTTTACGGCACCTCGACCCCAAAAAACTTGATTAGGGTGATGGTTCACGTAGTGGGCCATCGCCCTGATAGACGGTTTTTCGCCCTTTGACGTTGGAGTCCACGTTCTTTAATAGTGGACTCTTGTTCCAAACTGGAACAACACTCAACCCTATCTCGGTCTATTCTTTTGATTTATAAGGGATTTTGCCGATTTCGGCCTATTGGTTAAAAAATGAGCTGATTTAACAAAAATTTAACGCGAATTAATTCTGTGGAATGTGTGTCAGTTAGGGTGTGGAAAGTCCCCAGGCTCCCCAGCAGGCAGAAGTATGCAAAGCATGCATCTCAATTAGTCAGCAACCAGGTGTGGAAAGTCCCCAGGCTCCCCAGCAGGCAGAAGTATGCAAAGCATGCATCTCAATTAGTCAGCAACCATAGTCCCGCCCCTAACTCCGCCCATCCCGCCCCTAACTCCGCCCAGTTCCGCCCATTCTCCGCCCCATGGCTGACTAATTTTTTTTATTTATGCAGAGGCCGAGGCCGCCTCTGCCTCTGAGCTATTCCAGAAGTAGTGAGGAGGCTTTTTTGGAGGCCTAGGCTTTTGCAAAAAGCTCCCGGGAGCTTGTATATCCATTTTCGGATCTGATCAAGAGACAGGATGAGGATCGTTTCGCATGATTGAACAAGATGGATTGCACGCAGGTTCTCCGGCCGCTTGGGTGGAGAGGCTATTCGGCTATGACTGGGCACAACAGACAATCGGCTGCTCTGATGCCGCCGTGTTCCGGCTGTCAGCGCAGGGGCGCCCGGTTCTTTTTGTCAAGACCGACCTGTCCGGTGCCCTGAATGAACTGCAGGACGAGGCAGCGCGGCTATCGTGGCTGGCCACGACGGGCGTTCCTTGCGCAGCTGTGCTCGACGTTGTCACTGAAGCGGGAAGGGACTGGCTGCTATTGGGCGAAGTGCCGGGGCAGGATCTCCTGTCATCTCACCTTGCTCCTGCCGAGAAAGTATCCATCATGGCTGATGCAATGCGGCGGCTGCATACGCTTGATCCGGCTACCTGCCCATTCGACCACCAAGCGAAACATCGCATCGAGCGAGCACGTACTCGGATGGAAGCCGGTCTTGTCGATCAGGATGATCTGGACGAAGAGCATCAGGGGCTCGCGCCAGCCGAACTGTTCGCCAGGCTCAAGGCGCGCATGCCCGACGGCGAGGATCTCGTCGTGACCCATGGCGATGCCTGCTTGCCGAATATCATGGTGGAAAATGGCCGCTTTTCTGGATTCATCGACTGTGGCCGGCTGGGTGTGGCGGACCGCTATCAGGACATAGCGTTGGCTACCCGTGATATTGCTGAAGAGCTTGGCGGCGAATGGGCTGACCGCTTCCTCGTGCTTTACGGTATCGCCGCTCCCGATTCGCAGCGCATCGCCTTCTATCGCCTTCTTGACGAGTTCTTCTGAGCGGGACTCTGGGGTTCGAAATGACCGACCAAGCGACGCCCAACCTGCCATCACGAGATTTCGATTCCACCGCCGCCTTCTATGAAAGGTTGGGCTTCGGAATCGTTTTCCGGGACGCCGGCTGGATGATCCTCCAGCGCGGGGATCTCATGCTGGAGTTCTTCGCCCACCCCAACTTGTTTATTGCAGCTTATAATGGTTACAAATAAAGCAATAGCATCACAAATTTCACAAATAAAGCATTTTTTTCACTGCATTCTAGTTGTGGTTTGTCCAAACTCATCAATGTATCTTATCATGTCTGTATACCGTCGACCTCTAGCTAGAGCTTGGCGTAATCATGGTCATAGCTGTTTCCTGTGTGAAATTGTTATCCGCTCACAATTCCACACAACATACGAGCCGGAAGCATAAAGTGTAAAGCCTGGGGTGCCTAATGAGTGAGCTAACTCACATTAATTGCGTTGCGCTCACTGCCCGCTTTCCAGTCGGGAAACCTGTCGTGCCAGCTGCATTAATGAATCGGCCAACGCGCGGGGAGAGGCGGTTTGCGTATTGGGCGCTCTTCCGCTTCCTCGCTCACTGACTCGCTGCGCTCGGTCGTTCGGCTGCGGCGAGCGGTATCAGCTCACTCAAAGGCGGTAATACGGTTATCCACAGAATCAGGGGATAACGCAGGAAAGAACATGTGAGCAAAAGGCCAGCAAAAGGCCAGGAACCGTAAAAAGGCCGCGTTGCTGGCGTTTTTCCATAGGCTCCGCCCCCCTGACGAGCATCACAAAAATCGACGCTCAAGTCAGAGGTGGCGAAACCCGACAGGACTATAAAGATACCAGGCGTTTCCCCCTGGAAGCTCCCTCGTGCGCTCTCCTGTTCCGACCCTGCCGCTTACCGGATACCTGTCCGCCTTTCTCCCTTCGGGAAGCGTGGCGCTTTCTCATAGCTCACGCTGTAGGTATCTCAGTTCGGTGTAGGTCGTTCGCTCCAAGCTGGGCTGTGTGCACGAACCCCCCGTTCAGCCCGACCGCTGCGCCTTATCCGGTAACTATCGTCTTGAGTCCAACCCGGTAAGACACGACTTATCGCCACTGGCAGCAGCCACTGGTAACAGGATTAGCAGAGCGAGGTATGTAGGCGGTGCTACAGAGTTCTTGAAGTGGTGGCCTAACTACGGCTACACTAGAAGAACAGTATTTGGTATCTGCGCTCTGCTGAAGCCAGTTACCTTCGGAAAAAGAGTTGGTAGCTCTTGATCCGGCAAACAAACCACCGCTGGTAGCGGTTTTTTTGTTTGCAAGCAGCAGATTACGCGCAGAAAAAAAGGATCTCAAGAAGATCCTTTGATCTTTTCTACGGGGTCTGACGCTCAGTGGAACGAAAACTCACGTTAAGGGATTTTGGTCATGAGATTATCAAAAAGGATCTTCACCTAGATCCTTTTAAATTAAAAATGAAGTTTTAAATCAATCTAAAGTATATATGAGTAAACTTGGTCTGACAGTTACCAATGCTTAATCAGTGAGGCACCTATCTCAGCGATCTGTCTATTTCGTTCATCCATAGTTGCCTGACTCCCCGTCGTGTAGATAACTACGATACGGGAGGGCTTACCATCTGGCCCCAGTGCTGCAATGATACCGCGAGACCCACGCTCACCGGCTCCAGATTTATCAGCAATAAACCAGCCAGCCGGAAGGGCCGAGCGCAGAAGTGGTCCTGCAACTTTATCCGCCTCCATCCAGTCTATTAATTGTTGCCGGGAAGCTAGAGTAAGTAGTTCGCCAGTTAATAGTTTGCGCAACGTTGTTGCCATTGCTACAGGCATCGTGGTGTCACGCTCGTCGTTTGGTATGGCTTCATTCAGCTCCGGTTCCCAACGATCAAGGCGAGTTACATGATCCCCCATGTTGTGCAAAAAAGCGGTTAGCTCCTTCGGTCCTCCGATCGTTGTCAGAAGTAAGTTGGCCGCAGTGTTATCACTCATGGTTATGGCAGCACTGCATAATTCTCTTACTGTCATGCCATCCGTAAGATGCTTTTCTGTGACTGGTGAGTACTCAACCAAGTCATTCTGAGAATAGTGTATGCGGCGACCGAGTTGCTCTTGCCCGGCGTCAATACGGGATAATACCGCGCCACATAGCAGAACTTTAAAAGTGCTCATCATTGGAAAACGTTCTTCGGGGCGAAAACTCTCAAGGATCTTACCGCTGTTGAGATCCAGTTCGATGTAACCCACTCGTGCACCCAACTGATCTTCAGCATCTTTTACTTTCACCAGCGTTTCTGGGTGAGCAAAAACAGGAAGGCAAAATGCCGCAAAAAAGGGAATAAGGGCGACACGGAAATGTTGAATACTCATACTCTTCCTTTTTCAATATTATTGAAGCATTTATCAGGGTTATTGTCTCATGAGCGGATACATATTTGAATGTATTTAGAAAAATAAACAAATAGGGGTTCCGCGCACATTTCCCCGAAAAGTGCCACCTGACGTC |
| QPCT | ATGGCAGGCGGAAGACACCGGCGCGTCGTGGGCACCCTCCACCTGCTGCTGCTGGTGGCCGCCCTGCCCTGGGCATCCAGGGGGGTCAGTCCGAGTGCCTCAGCCTGGCCAGAGGAGAAGAATTACCACCAGCCAGCCATTTTGAATTCATCGGCTCTTCGGCAAATTGCAGAAGGCACCAGTATCTCTGAAATGTGGCAAAATGACTTACAGCCATTGCTGATAGAGCGATACCCGGGATCCCCTGGAAGCTATGCTGCTCGTCAGCACATCATGCAGCGAATTCAGAGGCTTCAGGCTGACTGGGTCTTGGAAATAGACACCTTCTTGAGTCAGACACCCTATGGGTACCGGTCTTTCTCAAATATCATCAGCACCCTCAATCCCACTGCTAAACGACATTTGGTCCTCGCCTGCCACTATGACTCCAAGTATTTTTCCCACTGGAACAACAGAGTGTTTGTAGGAGCCACTGATTCAGCCGTGCCATGTGCAATGATGTTGGAACTTGCTCGTGCCTTAGACAAGAAACTCCTTTCCTTAAAGACTGTTTCAGACTCCAAGCCAGATTTGTCACTCCAGCTGATCTTCTTTGATGGTGAAGAGGCTTTTCTTCACTGGTCTCCTCAAGATTCTCTCTATGGGTCTCGACACTTAGCTGCAAAGATGGCATCGACCCCGCACCCACCTGGAGCGAGAGGCACCAGCCAACTGCATGGCATGGATTTATTGGTCTTATTGGATTTGATTGGAGCTCCAAACCCAACGTTTCCCAATTTTTTTCCAAACTCAGCCAGGTGGTTCGAAAGACTTCAAGCAATTGAACATGAACTTCATGAATTGGGTTTGCTCAAGGATCACTCTTTGGAGGGGCGGTATTTCCAGAATTACAGTTATGGAGGTGTGATTCAGGATGACCATATTCCATTTTTAAGAAGAGGTGTTCCAGTTCTGCATCTGATACCGTCTCCTTTCCCTGAAGTCTGGCACACCATGGATGACAATGAAGAAAATTTGGATGAATCAACCATTGACAATCTAAACAAAATCCTACAAGTCTTTGTGTTGGAATATCTTCATTTGGGAGGTGGAGGATCAATGTCCCCTATACTAGGTTATTGGAAAATTAAGGGCCTTGTGCAACCCACTCGACTTCTTTTGGAATATCTTGAAGAAAAATATGAAGAGCATTTGTATGAGCGCGATGAAGGTGATAAATGGCGAAACAAAAAGTTTGAATTGGGTTTGGAGTTTCCCAATCTTCCTTATTATATTGATGGTGATGTTAAATTAACACAGTCTATGGCCATCATACGTTATATAGCTGACAAGCACAACATGTTGGGTGGTTGTCCAAAAGAGCGTGCAGAGATTTCAATGCTTGAAGGAGCGGTTTTGGATATTAGATACGGTGTTTCGAGAATTGCATATAGTAAAGACTTTGAAACTCTCAAAGTTGATTTTCTTAGCAAGCTACCTGAAATGCTGAAAATGTTCGAAGATCGTTTATGTCATAAAACATATTTAAATGGTGATCATGTAACCCATCCTGACTTCATGTTGTATGACGCTCTTGATGTTGTTTTATACATGGACCCAATGTGCCTGGATGCGTTCCCAAAATTAGTTTGTTTTAAAAAACGTATTGAAGCTATCCCACAAATTGATAAGTACTTGAAATCCAGCAAGTATATAGCATGGCCTTTGCAGGGCTGGCAAGCCACGTTTGGTGGTGGCGACCATCCTCCAAAATCGGATCTGGTTCCGCGTGGATCCTA |

**Table S2. The sense and antisense strands of knockdown plasmids sequences for PTPRG-AS1 and QPCT**

| **ID** | **5’** | **Stem** | **loop** | **Stem** | **3’** |
| --- | --- | --- | --- | --- | --- |
| shPTPRG-AS1-1#  **sense strands** | Ccgg | GCACCCACCACTAGAATTTGA | CTCGAG | TCAAATTCTAGTGGTGGGTGC | TTTTTg |
| shPTPRG-AS1-1#  **antisense strands** | aattcaaaaa | GCACCCACCACTAGAATTTGA | CTCGAG | TCAAATTCTAGTGGTGGGTGC |  |
| shPTPRG-AS1-2#  **sense strands** | Ccgg | GCTTGTGCTCCTAGGGTATTC | CTCGAG | GAATACCCTAGGAGCACAAGC | TTTTTg |
| shPTPRG-AS1-2#**antisense strands** | aattcaaaaa | GCTTGTGCTCCTAGGGTATTC | CTCGAG | GAATACCCTAGGAGCACAAGC |  |
| shPTPRG-AS1-3#**sense strands** | Ccgg | GCTAATGAGAGGTTAGCTTGC | CTCGAG | GCAAGCTAACCTCTCATTAGC | TTTTTg |
| shPTPRG-AS1-3#**antisense strands** | aattcaaaaa | GCTAATGAGAGGTTAGCTTGC | CTCGAG | GCAAGCTAACCTCTCATTAGC |  |
| shNC  **sense strands** | Ccgg | TTCTCCGAACGTGTCACGT | CTCGAG | ACGTGACACGTTCGGAGAA | TTTTTg |
| shNC  **antisense strands** | aattcaaaaa | TTCTCCGAACGTGTCACGT | CTCGAG | ACGTGACACGTTCGGAGAA |  |
| shQPCT  **sense strands** | Ccgg | ccACTGGAACAACAGAGTGTT | CTCGAG | AACACTCTGTTGTTCCAGTGG | TTTTTg |
| shQPCT  **antisense strands** | aattcaaaaa | ccACTGGAACAACAGAGTGTT | CTCGAG | AACACTCTGTTGTTCCAGTGG |  |
| shNC  **sense strands** | Ccgg | TTCTCCGAACGTGTCACGT | CTCGAG | ACGTGACACGTTCGGAGAA | TTTTTg |
| shNC  **antisense strands** | aattcaaaaa | TTCTCCGAACGTGTCACGT | CTCGAG | ACGTGACACGTTCGGAGAA |  |

**Table S3. The sequences of miR-4659a-3p mimic and inhibitor**

|  | sequences |
| --- | --- |
| miR-4659a-3p mimic | 5'-UUUCUUCUUAGACAUGGCAACG-3'  3'-UUAAAGAAGAAUCUGUACCGUU-5' |
| mimic negative control | Catolog. No.: CmiR-SN0001-SN |
| miR-4659a-3p inhibitor | CGUUGCCAUGUCUAAGAAGAAA |
| inhibitor negative control | Catolog. No.: CmiR-AN0001-SN |

**Table S4. The primer sequences used in the RT-qPCR**

|  | Forward Primer(5' - 3') | Reverse Primer(5' - 3') |
| --- | --- | --- |
| PTPRG-AS1 | TTTCCTCGCAGTTGAAGGTAGT | CAGAGCATTCCAATCATCCAGA |
| miR-4659a-3p | CTTCTTAGACATGGCAACGAAA | |
| U6 | CTCGCTTCGGCAGCACA | AACGCTTCACGAATTTGCGT |
| QPCT | GCTCCAAACCCAACGTTTCC | GGAAATACCGCCCCTCCAAA |
| β-actin | ACTTAGTTGCGTTACACCCTT | GTCACCTTCACCGTTCCA |
| GAPDH | TGTTCGTCATGGGTGTGAAC | ATGGCATGGACTGTGGTCAT |

**Table S5. Antibodies of Western Blot used in the experiments (polyclonal, Rabbit anti-human)**

| Assay | Name | Company | number |
| --- | --- | --- | --- |
| Western blot | QPCT | 1:500, Abcam, Cambridge, MA, USA | Ab201172 |
| GAPDH | 1:10000,Proteintech, Wuhan, China | 10494-1-AP |
| Anti-Rabbit | 1:10000,Bioworld, Atlanta, GA, USA | ZJ2020-R |

**
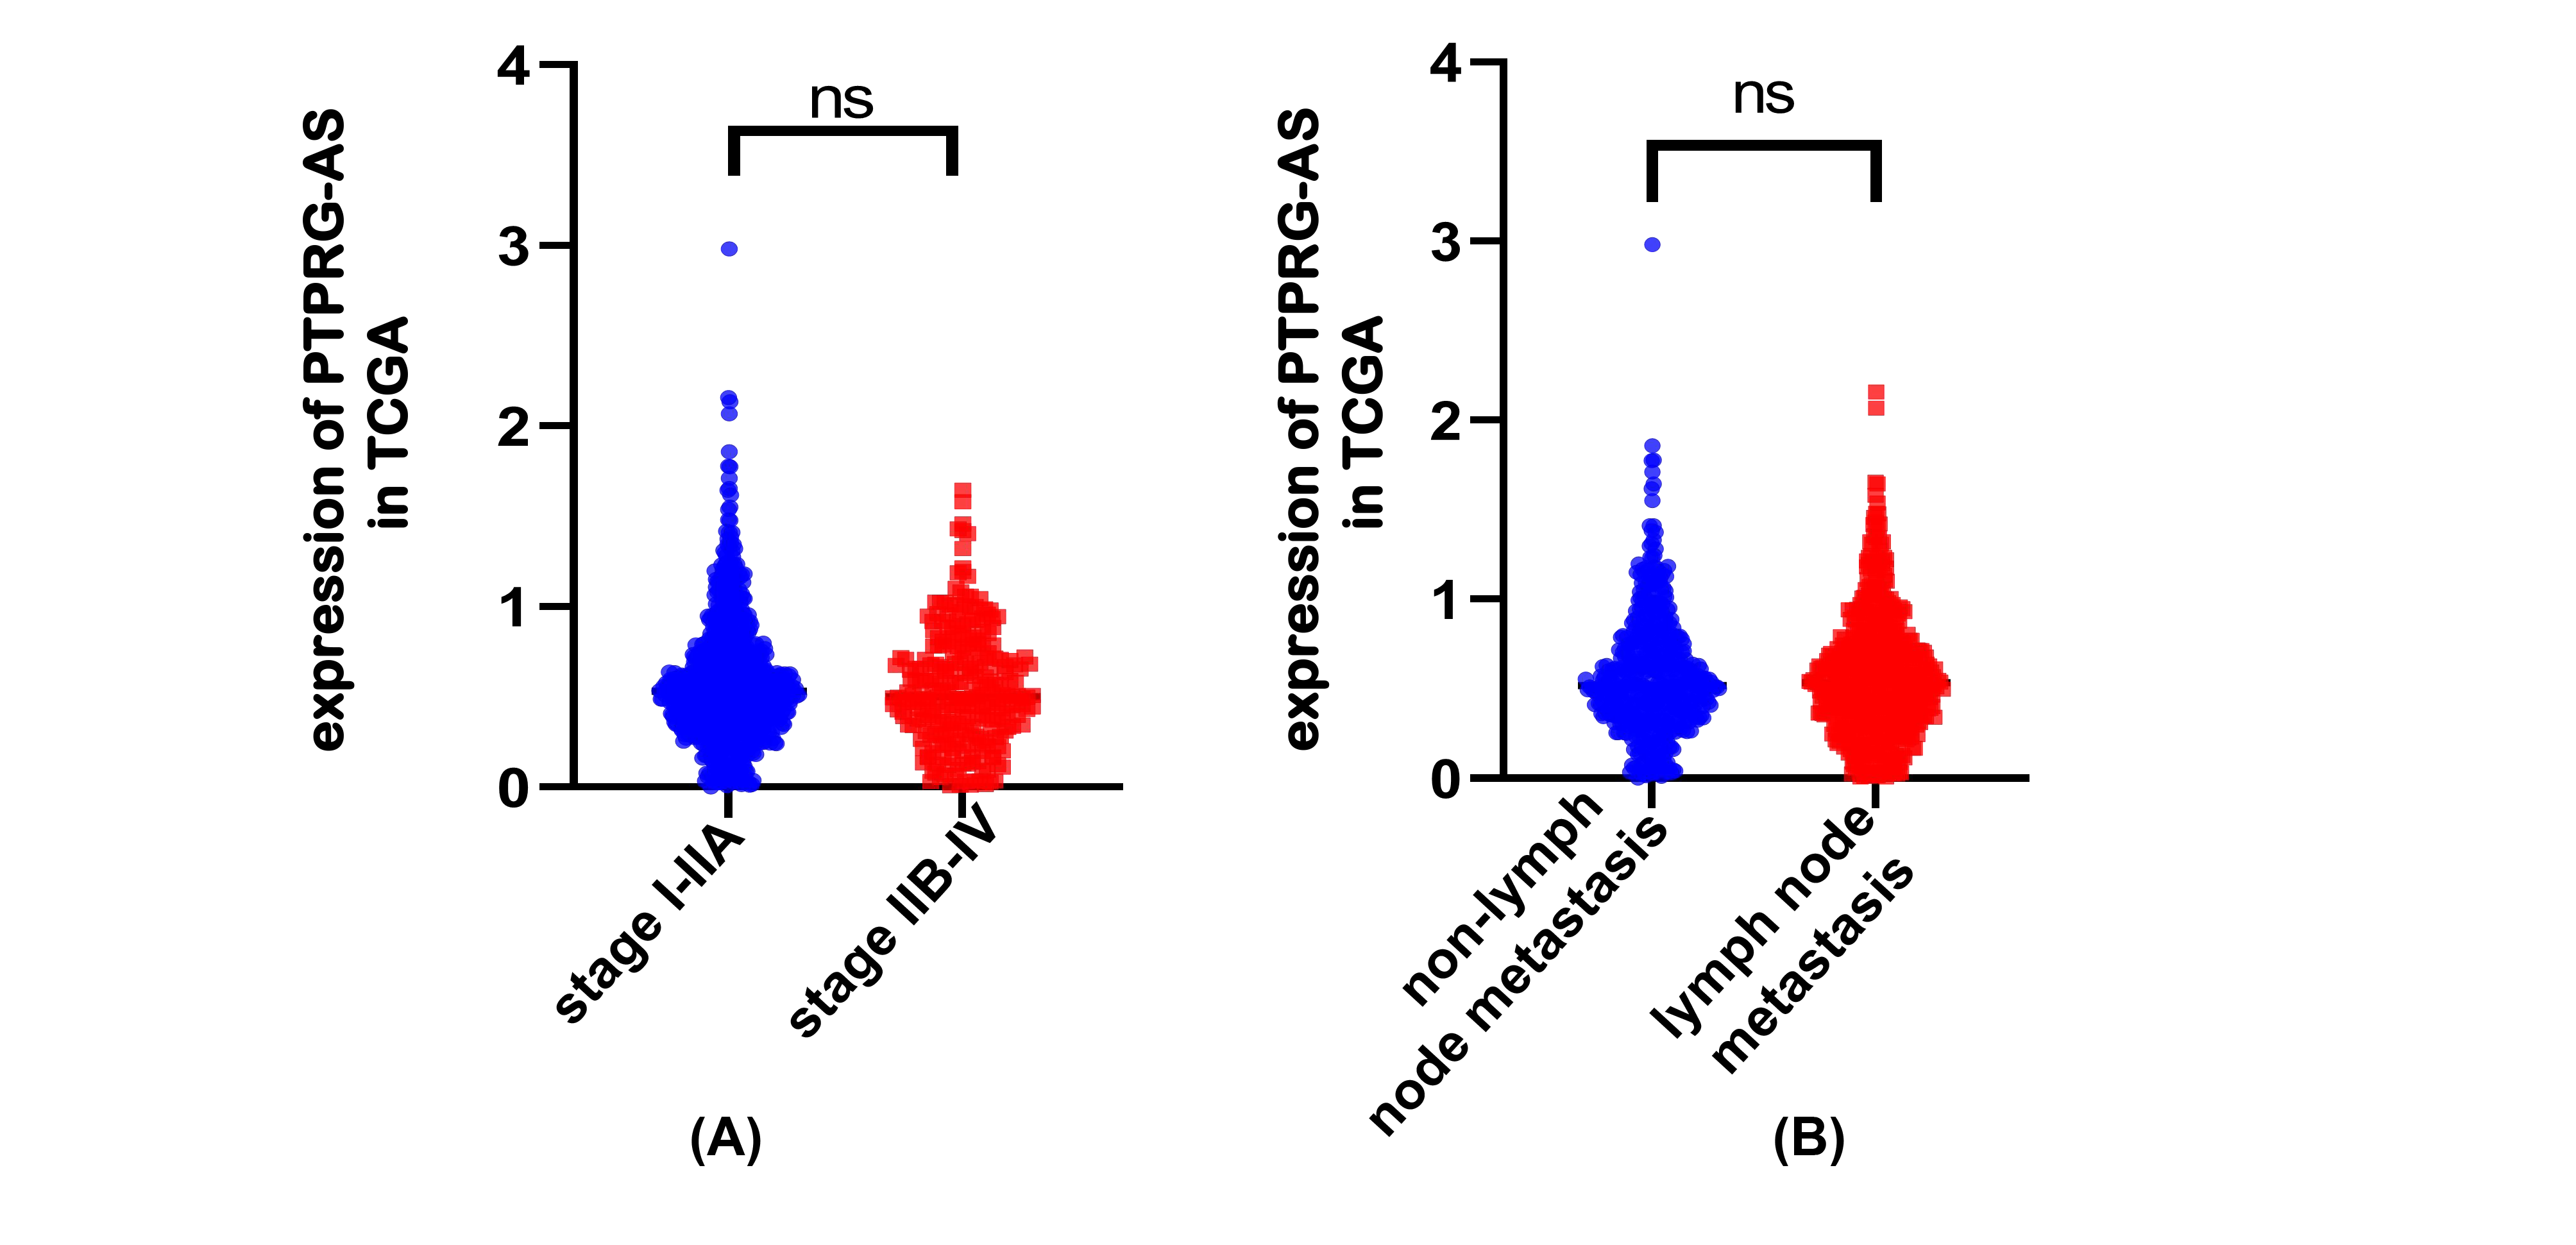
**

**Figure S1**

**Figure S1. (A)** Differential expression of PTPRG-AS1 in BRCA tissues at different TNM stages in the TCGA database (P=0.1724). **(B)** Differential expression of PTPRG-AS1 in lymphatic tissues with and without lymph node metastasis in the TCGA database (P=0.8989 ). *p<0.05, **p<0.01, ***p<0.001.


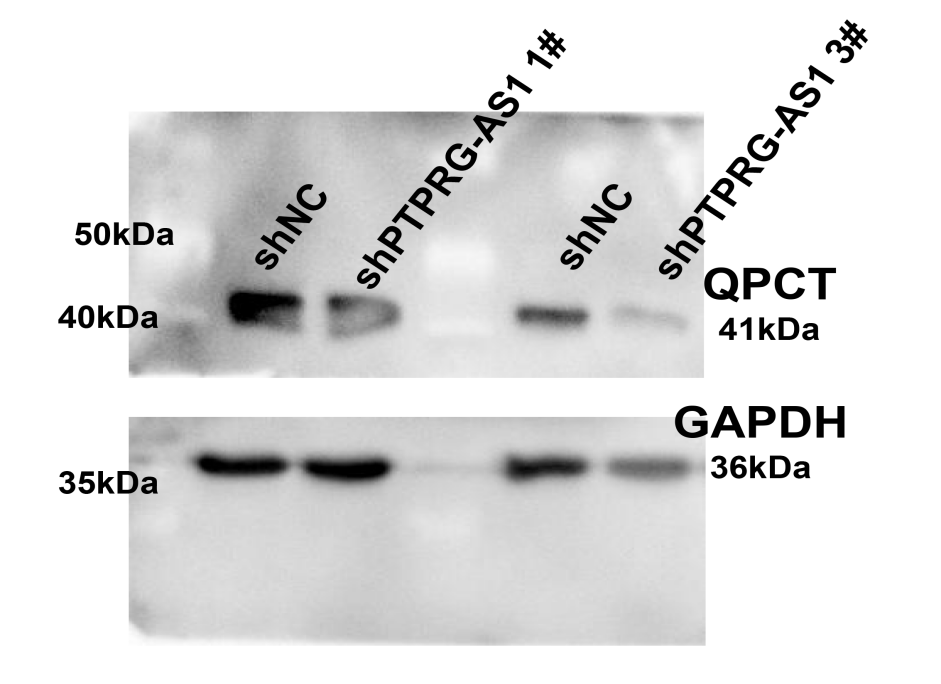


**Figure S2**

**Figure S2.** Western blot analysis was used to detect the protein expression levels of QPCT after transfection with LncRNA PTPRG-AS1 1# and LncRNA PTPRG-AS1 3# plasmids.


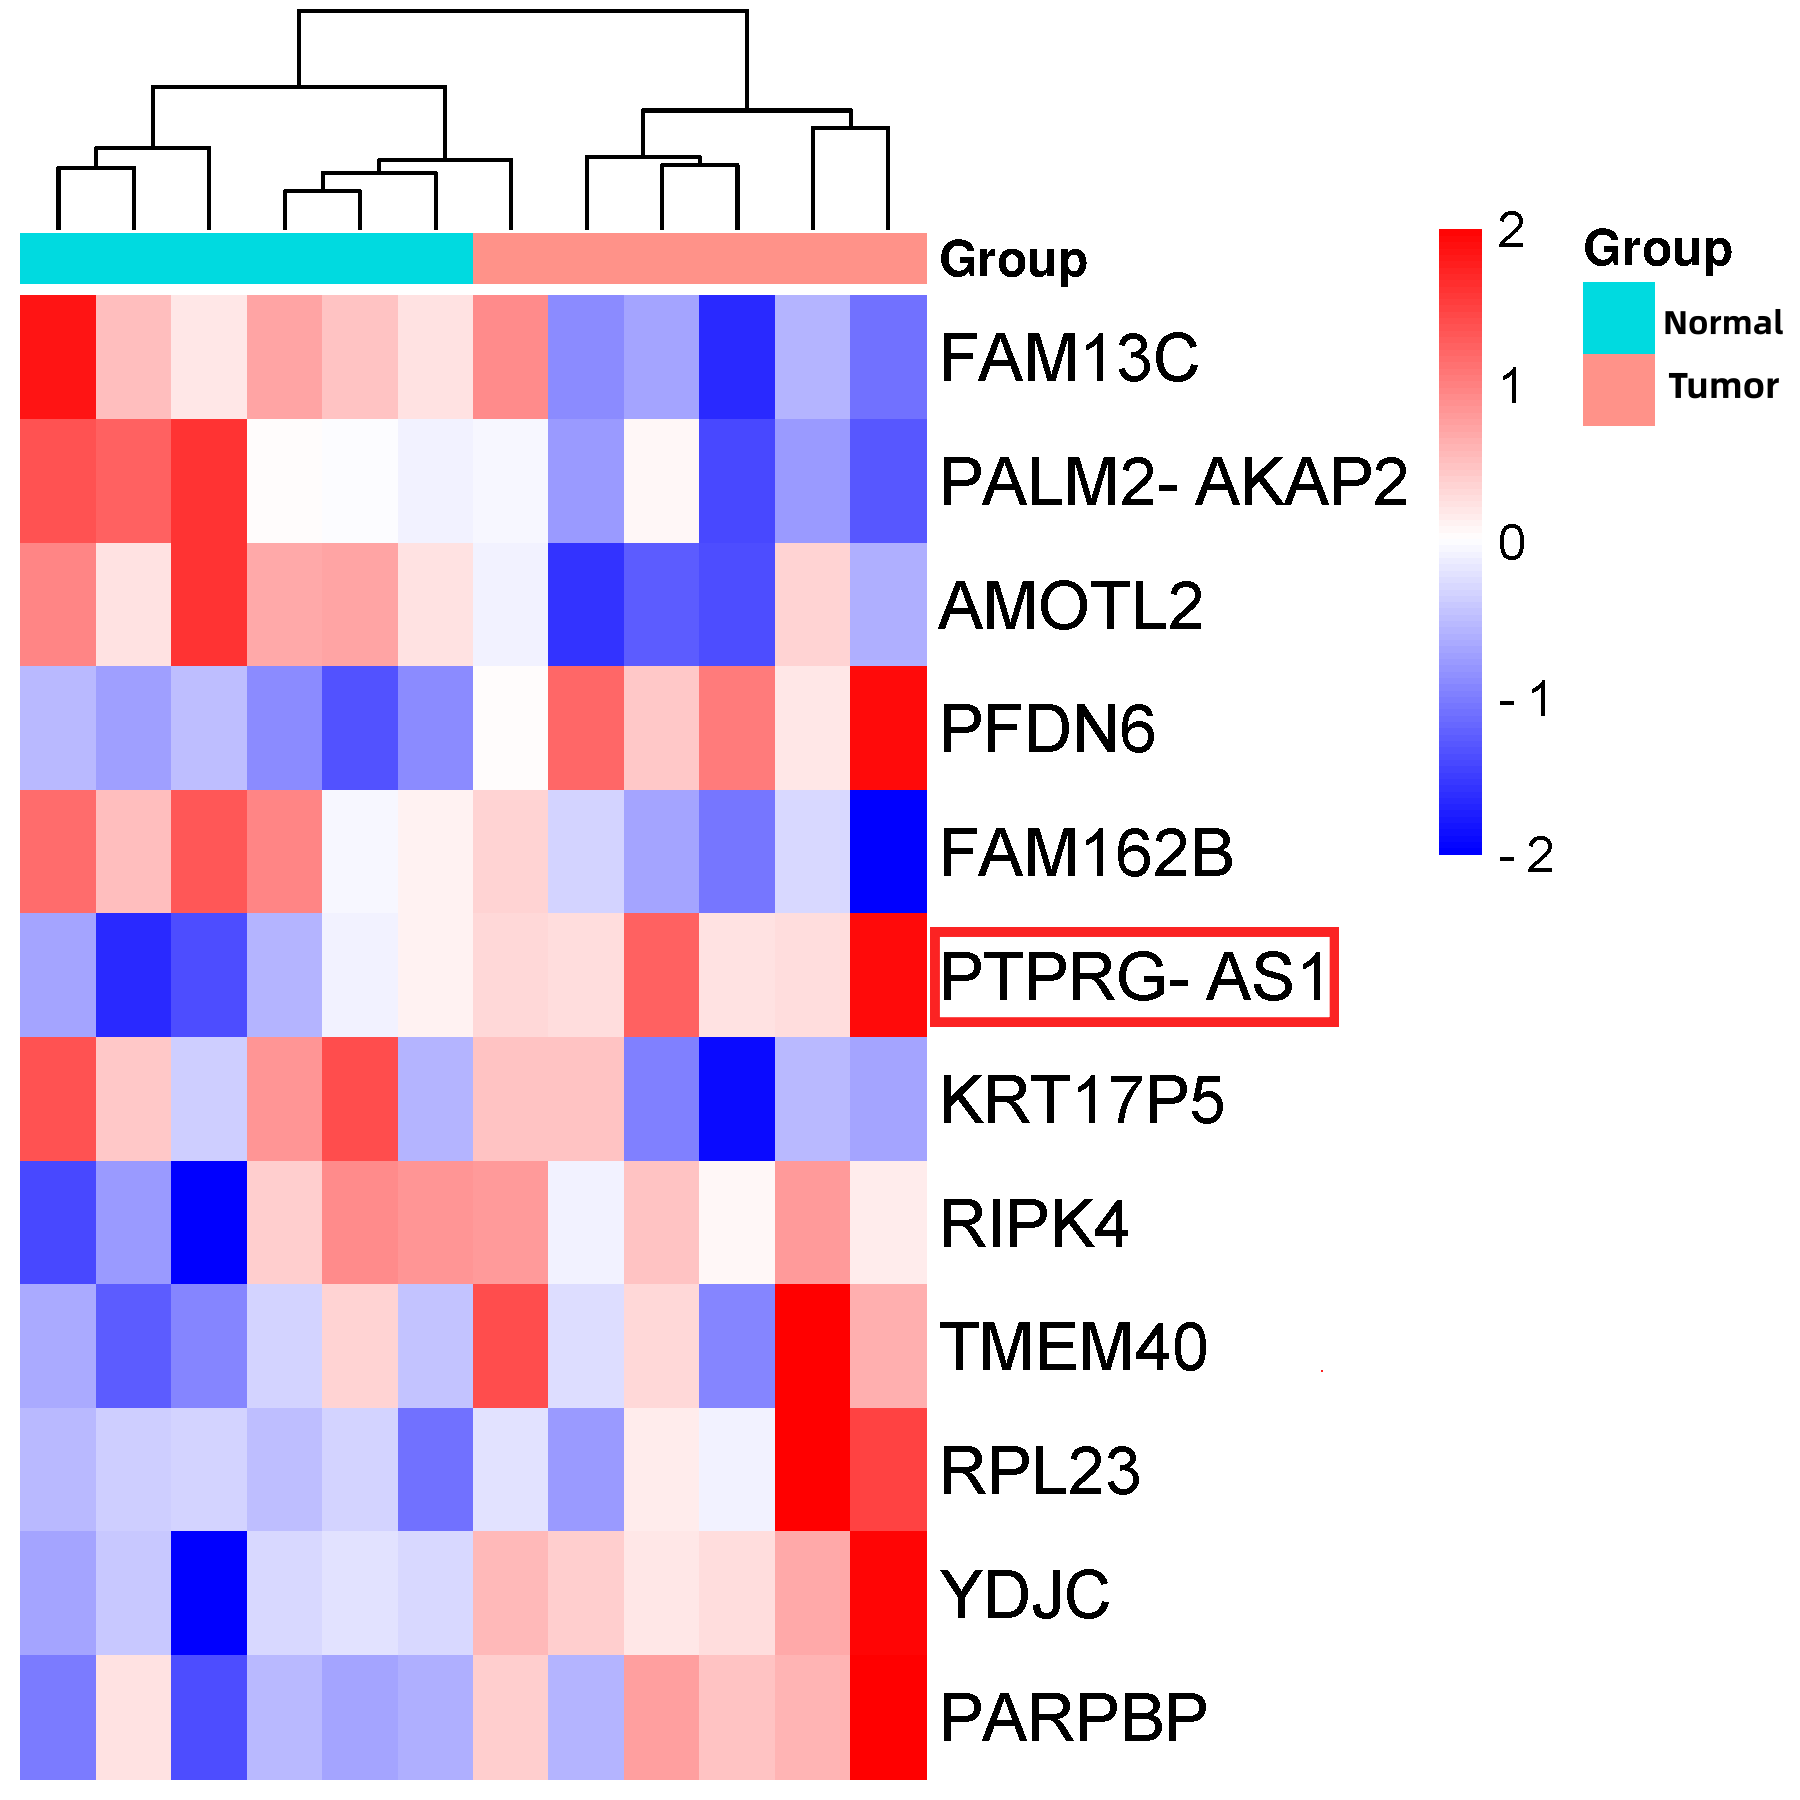


**Figure S3**

**Figure S3:** Heatmap of lncRNAs: LncRNA PTPRG-AS1 was overexpressed in breast cancer tumor tissues compared with normal tissues in public GSE156229 dataset. Red and green shades represent high and low expression respectively.

**Tumor**

**Normal**

**Relative expression of**

**PTPRG-AS1 in TCGA**

**Figure S4**

**Figure S4.** The expression level of PTPRG-AS1 in normal control tissues and breast cancer tissues based on TCGA database.（normal:113,Tumor:1092）


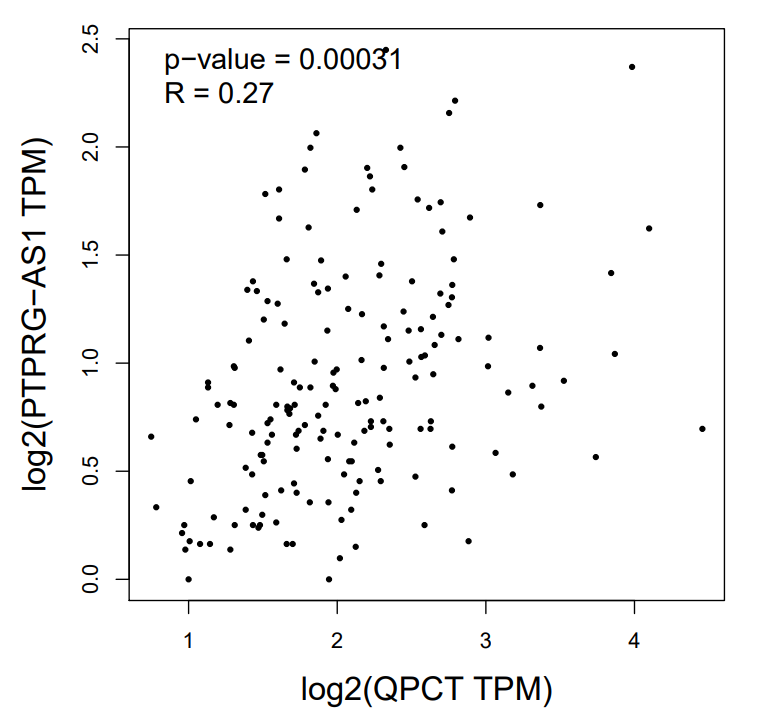


**Figure S5**

**Figure S5.** The GTEx database reveals a positive correlation between QPCT and PTPRG-AS1 in mammary tissue（P=0.00031).


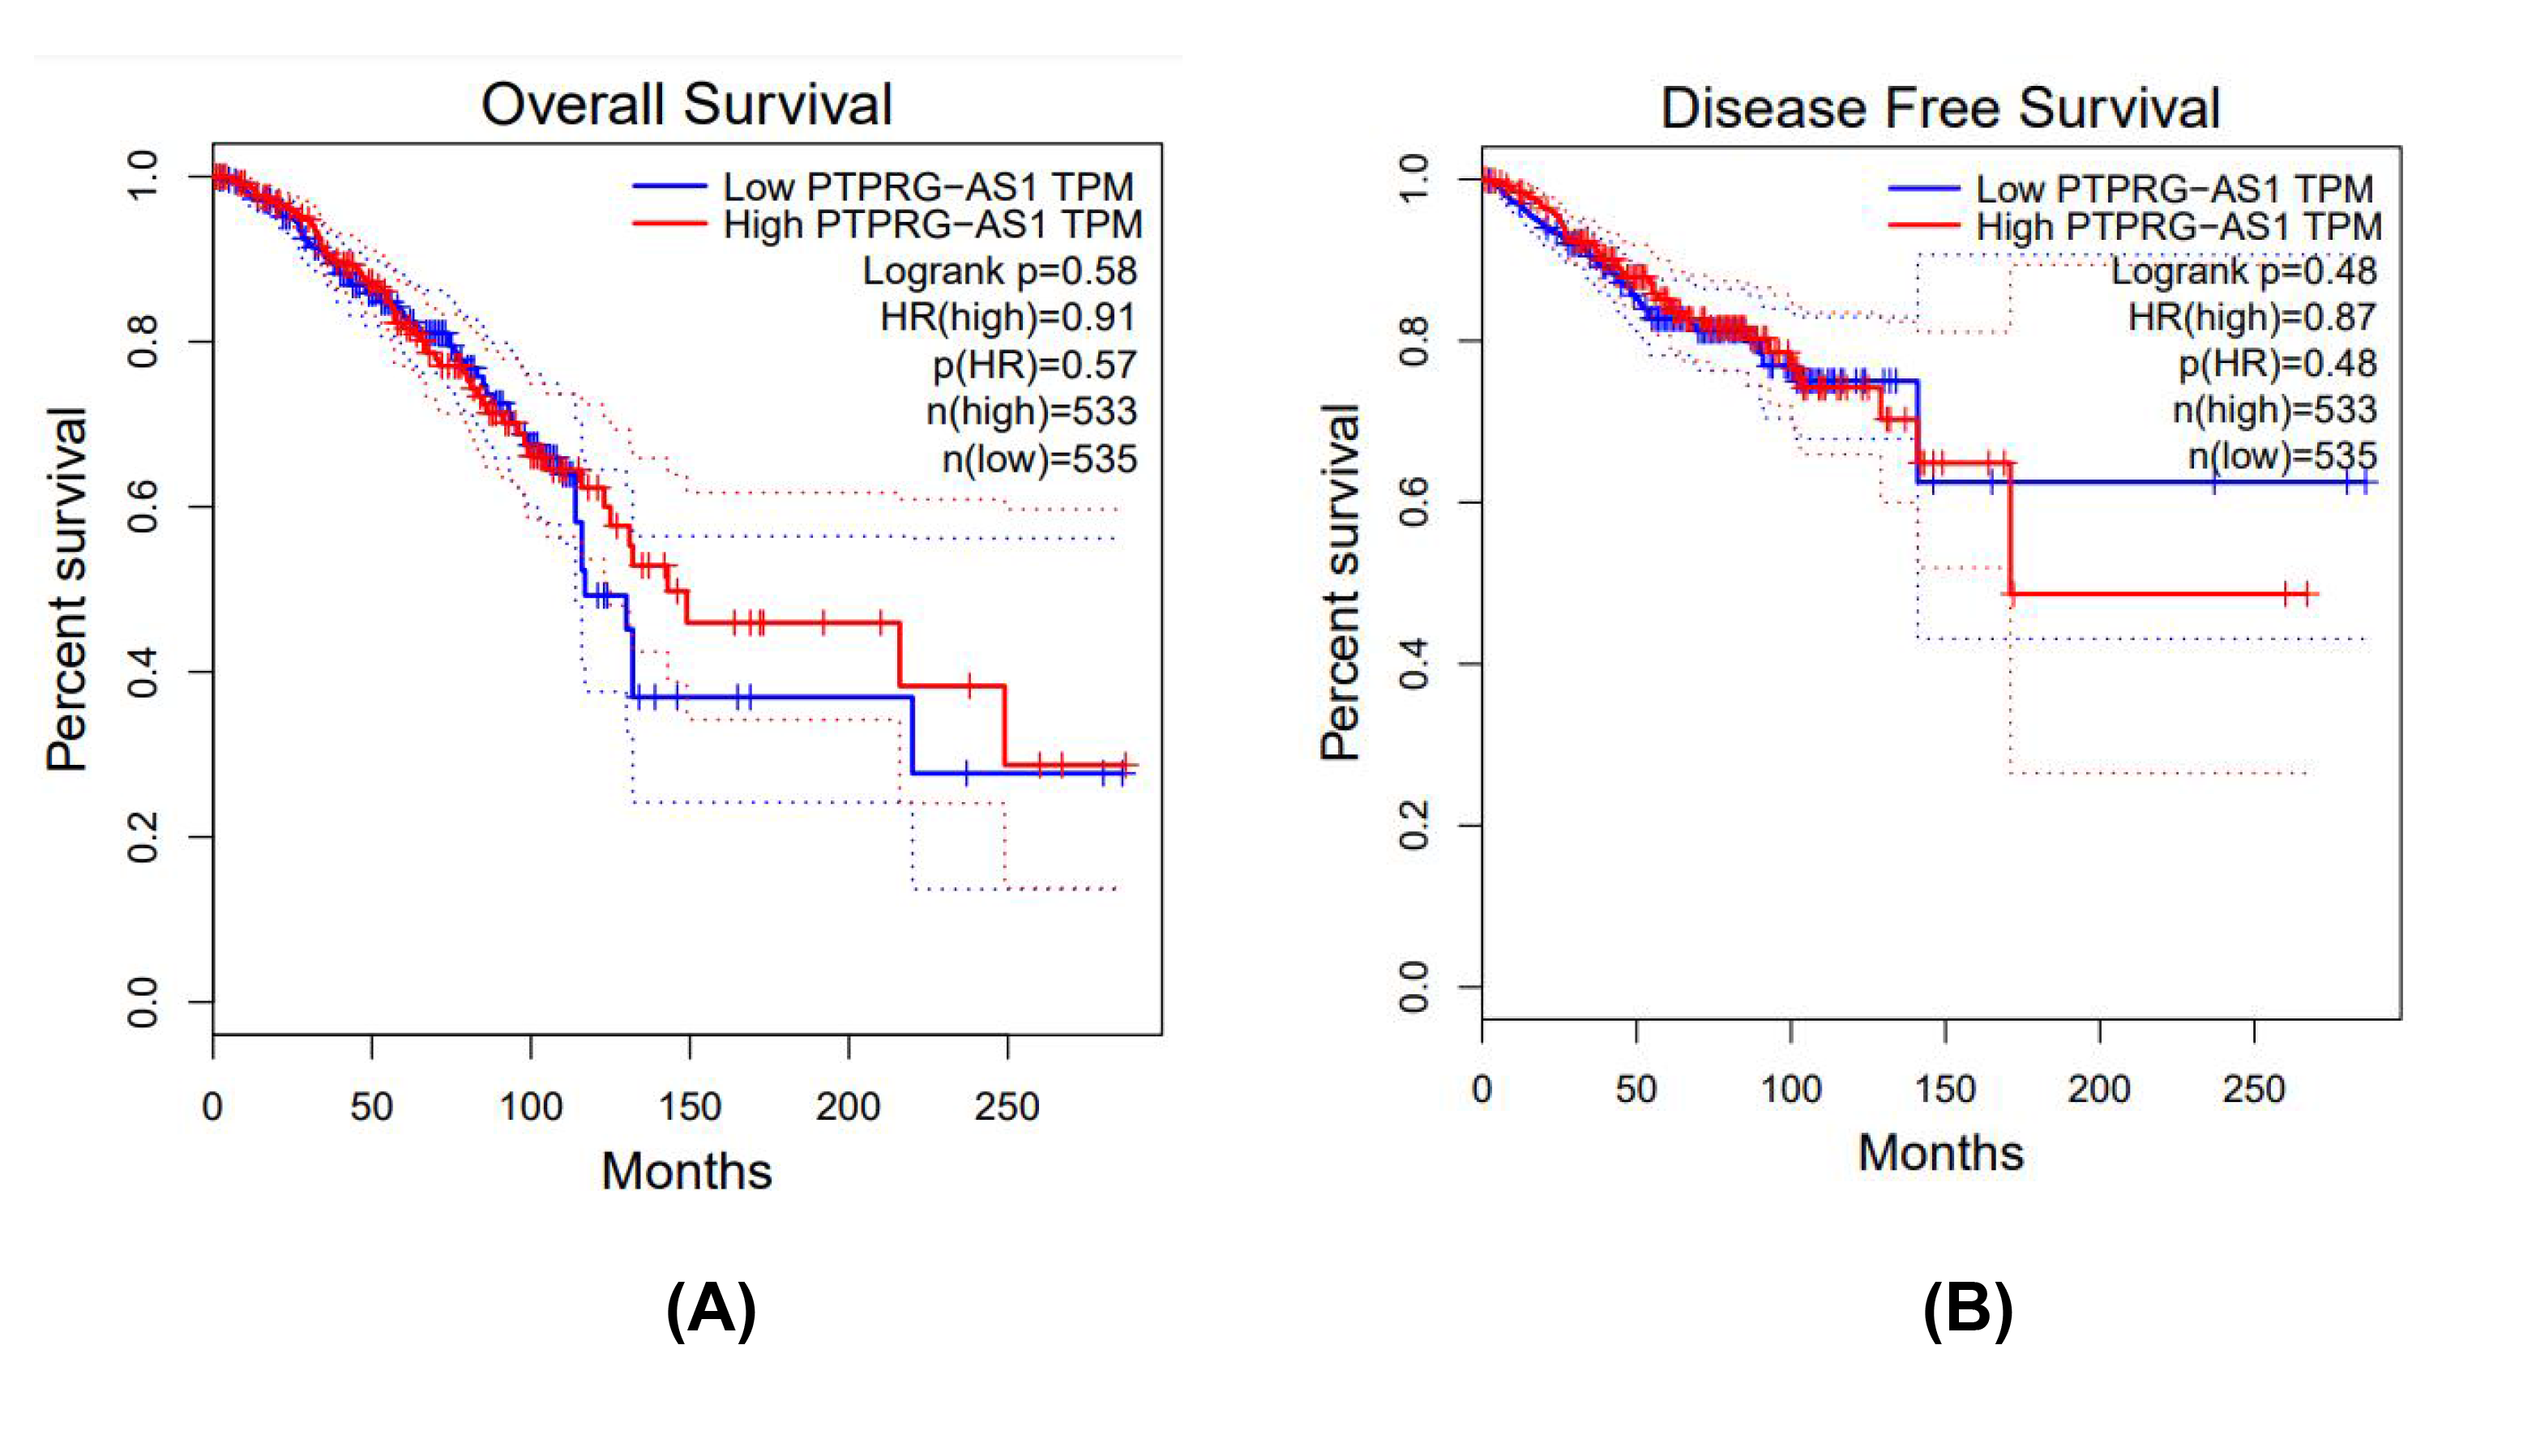
**Figure S6.** Overall survival **(A)** and Disease Freee Suevival **(B)** testing of PTPRG-AS1 in diferent human tumors from the Gepia and TCGA database.(n=1088,P=0.5731)
